# Supplementary material for: Significant increase of summertime ozone at Mt. Tai in Central Eastern China: 2003–2015
Source: Copernicus journal article supplement (doi:10.5194/acp-2016-220), 2016-03-24
Supplement: Supplementary file 1 [file acp-2016-220-supplement.pdf]

Supporting materials of

## **Significant increase of summertime ozone at Mt. Tai in Central Eastern China: 2003-2015**

Lei Sun<sup>1</sup>, Likun Xue<sup>1\*</sup>, Tao Wang<sup>2,1</sup>, Jian Gao<sup>3</sup>, Aijun Ding<sup>4</sup>, Owen R. Cooper<sup>5,6</sup>, Pengju Xu<sup>7</sup>, Zhe Wang<sup>2</sup>, Xinfeng Wang<sup>1</sup>, Liang Wen<sup>1</sup>, Yanhong Zhu<sup>1</sup>, Tianshu Chen<sup>1</sup>, Lingxiao Yang<sup>1,8</sup>, Yan Wang<sup>8</sup>, Jianmin Chen<sup>1,8</sup>, Wenxing Wang<sup>1</sup>

<sup>1</sup> Environment Research Institute, Shandong University, Ji'nan, Shandong, China

<sup>2</sup> Department of Civil and Environmental Engineering, Hong Kong Polytechnic University, Hong Kong, China

<sup>3</sup> Chinese Research Academy of Environmental Sciences, Beijing, China

<sup>4</sup> Institute for Climate and Global Change Research and School of Atmospheric Sciences, Nanjing University, Nanjing, Jiangsu, China

<sup>5</sup> Cooperative Institute for Research in Environmental Sciences, University of Colorado, Boulder, Colorado, United States

<sup>6</sup> NOAA Earth System Research Laboratory, Boulder, Colorado, United States

<sup>7</sup> School of Geography and Environment, Shandong Normal University, Ji'nan, Shandong, China

<sup>8</sup> School of Environmental Science and Engineering, Shandong University, Ji'nan, Shandong, China

\*To whom correspondence should be addressed: Likun Xue: [xuelikun@sdu.edu.cn](mailto:xuelikun@sdu.edu.cn)

Page 1          Cover page

Page 2          Table S1

Page 2          Figure S1

Page 3          Figure S2

**Table S1.** Percentage distribution of different air masses at Mt. Tai in June and July-August during 2003-2015

| Year      | June |     |     |      | July-August |     |     |     |
|-----------|------|-----|-----|------|-------------|-----|-----|-----|
|           | M&EC | CC  | NEC | M&NC | M&EC        | CC  | NEC | SEC |
| 2003      | 50%  | 28% | 13% | 10%  | 38%         | 31% | 23% | 8%  |
| 2004      | 40%  | 53% | 8%  | 0%   | 27%         | 27% | 32% | 13% |
| 2005      | 35%  | 51% | 7%  | 8%   | 37%         | 28% | 24% | 11% |
| 2006      | 49%  | 39% | 5%  | 7%   | 46%         | 18% | 32% | 4%  |
| 2007      | 71%  | 17% | 13% | 0%   | 35%         | 19% | 41% | 5%  |
| 2008      | 78%  | 18% | 3%  | 2%   | 47%         | 14% | 34% | 5%  |
| 2009      | 43%  | 25% | 9%  | 23%  | 47%         | 19% | 33% | 0%  |
| 2010      | 73%  | 26% | 1%  | 0%   | 35%         | 34% | 30% | 1%  |
| 2011      | 48%  | 25% | 21% | 7%   | 34%         | 37% | 29% | 0%  |
| 2012      | 77%  | 12% | 4%  | 8%   | 39%         | 30% | 30% | 1%  |
| 2013      | 65%  | 13% | 17% | 5%   | 19%         | 37% | 29% | 15% |
| 2014      | 62%  | 25% | 8%  | 6%   | 33%         | 48% | 19% | 0%  |
| 2015      | 56%  | 12% | 11% | 22%  | 35%         | 31% | 23% | 11% |
| 2003-2015 | 57%  | 26% | 9%  | 8%   | 36%         | 29% | 29% | 6%  |

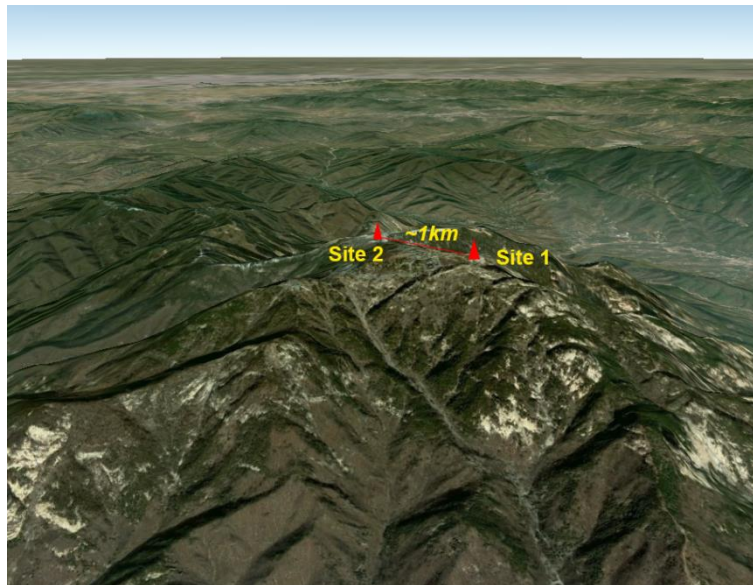

**Figure S1.** Map from Google Earth showing the relative locations of two study sites at the summit of Mt. Tai.

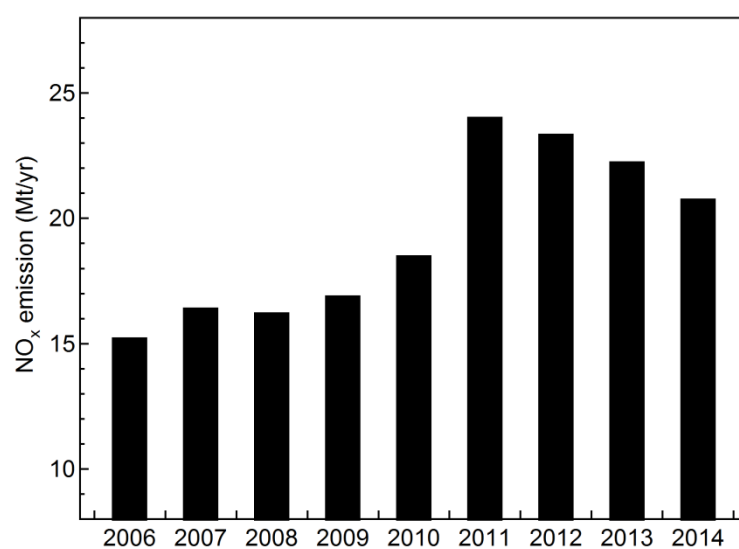

**Figure S2.** Annual anthropogenic NO<sub>x</sub> emissions during 2006–2014 in China. The data is taken from the Ministry of Environmental Protection of China (<http://www.mep.gov.cn/>).
